# Supplementary material for: Knockout of the Amino Acid Transporter SLC6A19 and Autoimmune Diabetes Incidence in Female Non-Obese Diabetic (NOD) Mice
Source: MDPI journal article supplement (doi:10.3390/metabo11100665), 2021-09-29
Supplement: s1 [file s1]

## Supplementary Materials

### CRISPR/Cas9 edited Slc6a19 deficient mouse strains Sanger sequencing chromatograms

#### 1. Mouse samples ASD707:Maggot::F0#6, 8, 9, 11, 12

##### Guide 1

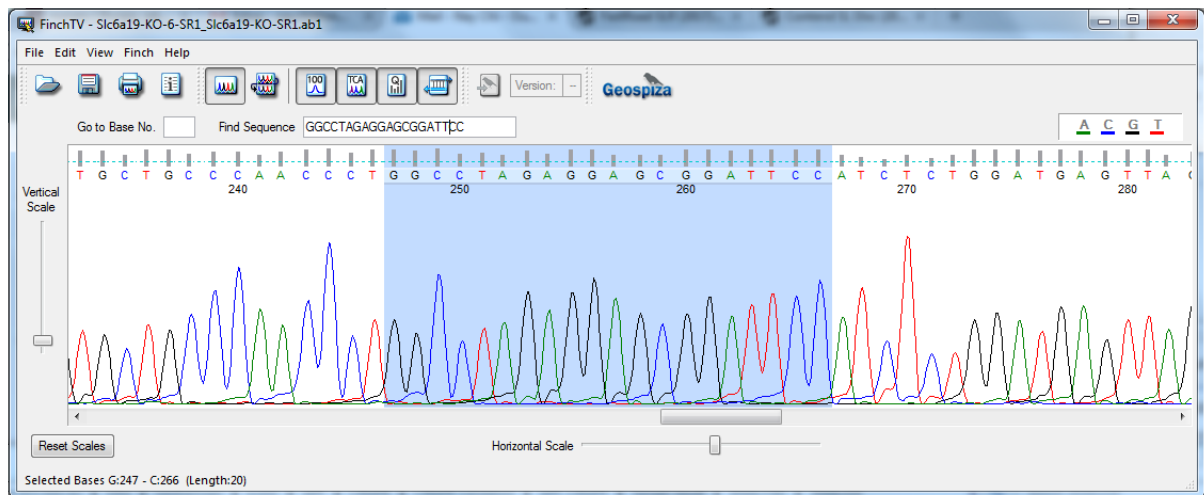

Reference AGGCTTGTGCTGCCCAACCTGGCCTAGAGGAGCGGATTCCATCTCTGGATGAGTTAGAGGTC

Allele1 AGGCTTGTGCTGCCCAACCTGGCCTAGAGGAGCGGATTCCATCTCTGGATGAGTTAGAGGTC

Allele2 AGGCTTGTGCTGCCCAACCTGGCCTAGAGGAGCGGATTCCATCTCTGGATGAGTTAGAGGTC

##### Guide 2

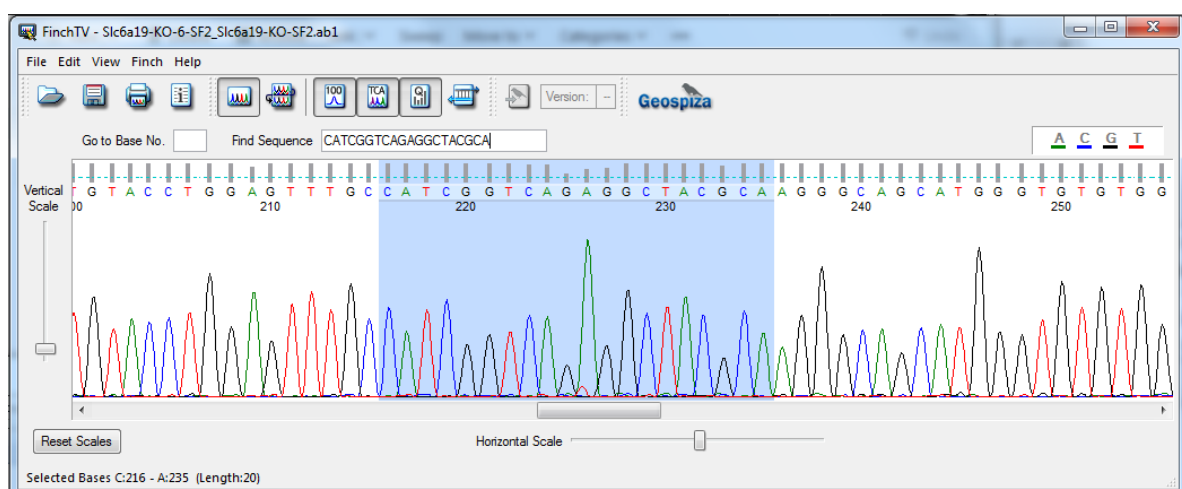

Reference TTGCTGTACCTGGAGTTTGCATCGGTCAGAGGCTACGCAAGGGCAGCATGGGTGTGTGGAGC

Allele1 TTGCTGTACCTGGAGTTTGCATCGGTCAGAGGCTACGCAAGGGCAGCATGGGTGTGTGGAGC

Allele2 TTGCTGTACCTGGAGTTTGCATCGGTCAGAGGCTACGCAAGGGCAGCATGGGTGTGTGGAGC

Mouse sample ASD707:Maggot:::F0#6 is WT in both alleles for both guide sequences.

Mouse samples ASD707:Maggot:::F0#8, 9, 11 and 12 have the same Sanger sequencing chromatograms as mouse sample ASD707:Maggot:::F0#6.

## 2. Mouse samples ASD707:Maggot:::F0#7

### Guide 1

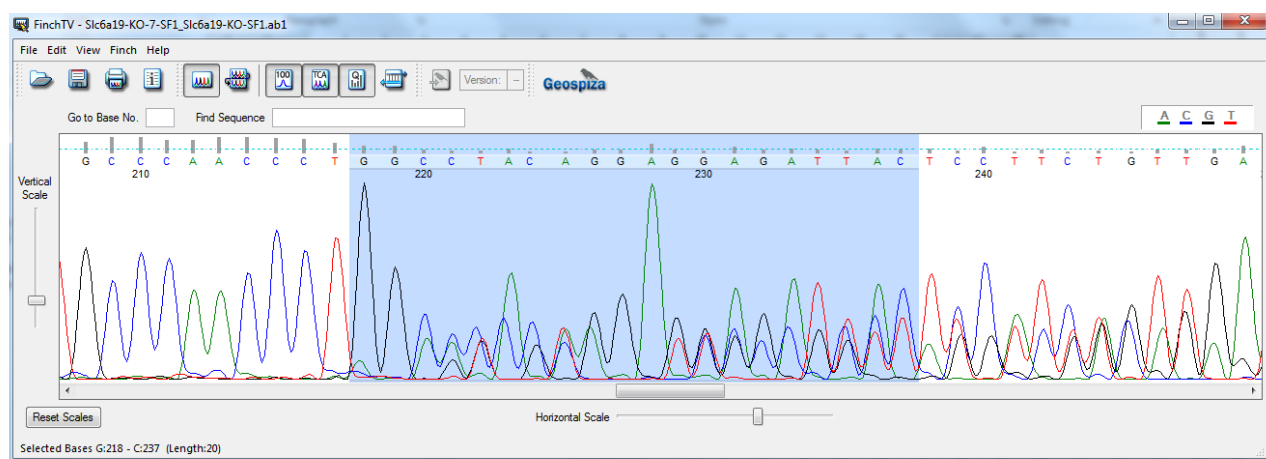

Reference GGCTTGTGCTGCCCAAC CCT GGCCTAGAGGAGCGGATTCC ATCTCTGGATGAGTTAGAGG

Allele1 GGCTTGTGCTGCCCAAC CCT GG CAC CCTAGAGGAGCGGATTCC ATCTCTGGATGAGTTAGAGG

Allele2 GGCTTGTGCTGCCCAAC CCT GG ----- AGGAGCGGATTCC ATCTCTGGATGAGTTAGAGG  
(OR)

GGCTTGTGCTGCCCAAC CCT G ----- GAGGAGCGGATTCC ATCTCTGGATGAGTTAGAGG

Allele 3 GGCTTGTGCTGCCCAAC CCT GGCCTAGAGGAGCGGATTCC ATCTCTGGATGAGTTAGAGG

### Guide 2

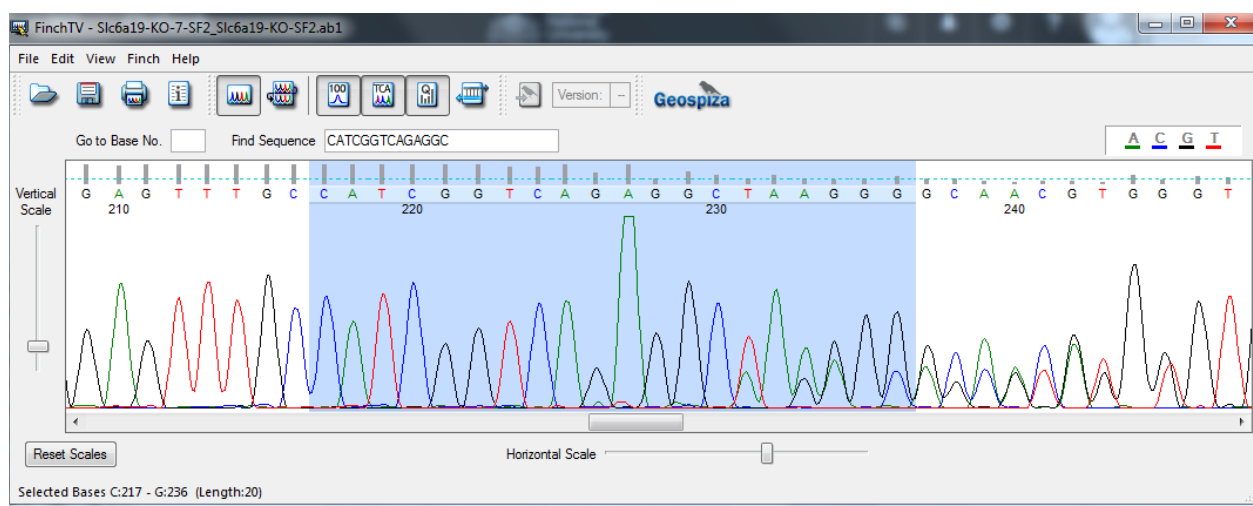

Reference TTGCTGTACCTGGAGTTTGC**CATCGGTCAGAGGCTACGCA**AGGGCAGCATGGGTGTGTGGAGC

Allele1 TTGCTGTACCTGGAGTTTGC**CATCGGTCAGAGGCTA**---AAGGGCAGCATGGGTGTGTGGAGC

Allele2 TTGCTGTACCTGGAGTTTGC**CATCGGTCAGAGGC**-----AAGGGCAGCATGGGTGTGTGGAGC

Mouse sample ASD707:Maggot:::F0#7 carries three alleles in guide 1 sequence region. The first allele carries 3bp insertion, the second allele carries 5bp deletion and the third allele is WT. In guide 2 sequence region, there are two alleles. The first allele carries 3bp deletion and the second allele carries 5bp deletion.

### 3. Mouse samples ASD707:Maggot:::F0#10

#### Guide 1

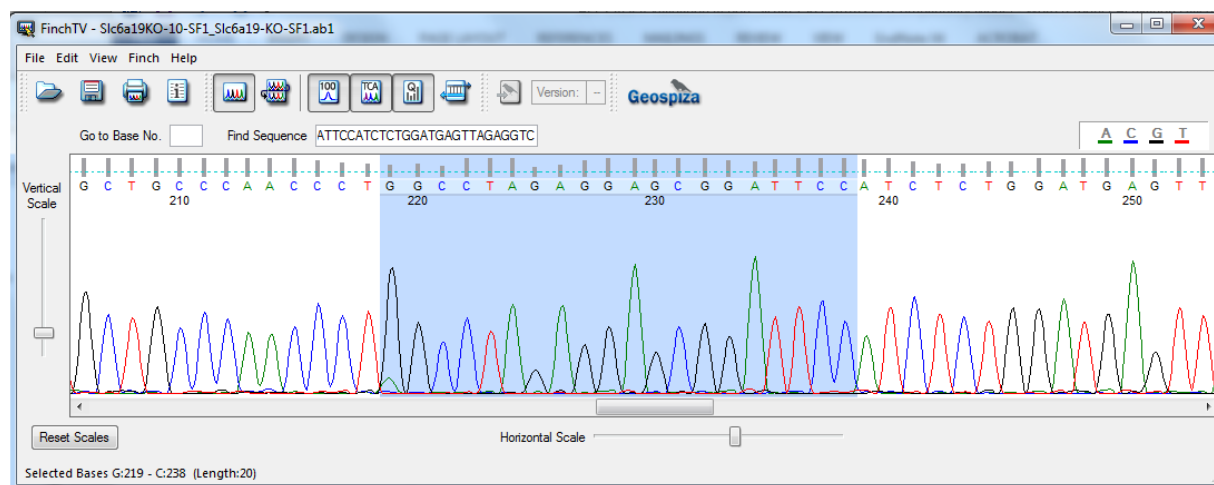

Reference AGGCTTGTGCTGCCCAAC**CCTGGCCTAGAGGAGCGGATTCC**ATCTCTGGATGAGTTAGAGGTC

Allele1 AGGCTTGTGCTGCCCAAC**CCTGGCCTAGAGGAGCGGATTCC**ATCTCTGGATGAGTTAGAGGTC

Allele2 AGGCTTGTGCTGCCCAAC**CCTGGCCTAGAGGAGCGGATTCC**ATCTCTGGATGAGTTAGAGGTC

#### Guide 2

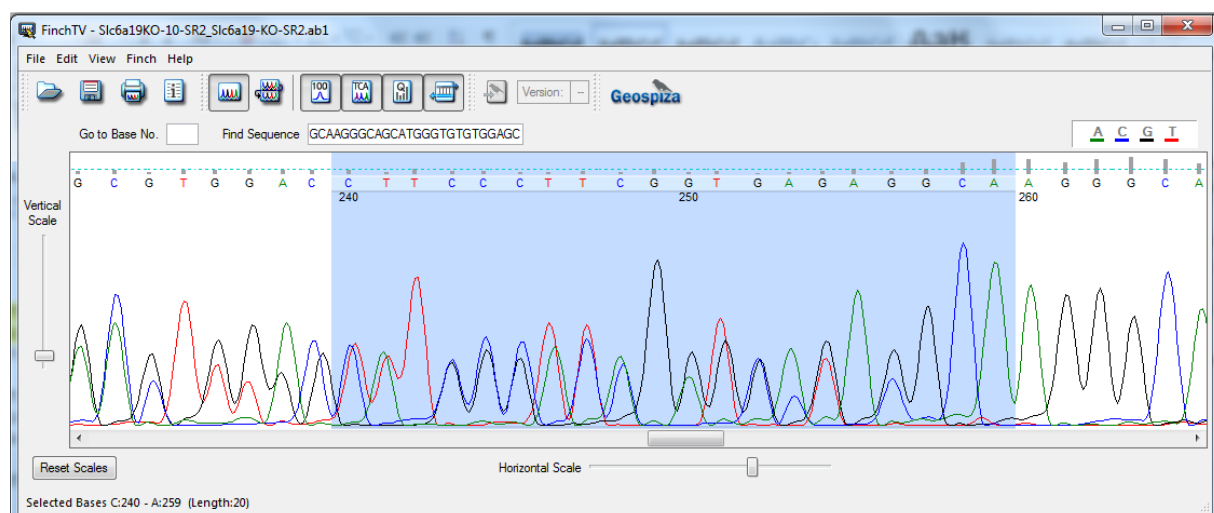

Reference TTGCTGTACCTGGAGTTTGC**CATCGGTCAGAGGCTACGCA**AGGGCAGCATGGGTGTGTGGAGC

Allele1 TTGCTGTACCTGGAGTTTGC**CATCGGTCAGAG**-----GCA**AGGGCAGCATGGGTGTGTGGAGC**

Allele2 TTGCTGTACCTGGAGTTTGC**CATCGGTCAGAGGCTACGCA**AGGGCAGCATGGGTGTGTGGAGC

Mouse sample ASD707:Maggot:::F0#10 is WT in both alleles in guide 1 sequence region. In guide 2 sequence region, there are two alleles. The first allele carries 5bp deletion and the second allele is WT.

#### 4. Mouse samples ASD707:Maggot:::F0#13

##### Guide 1

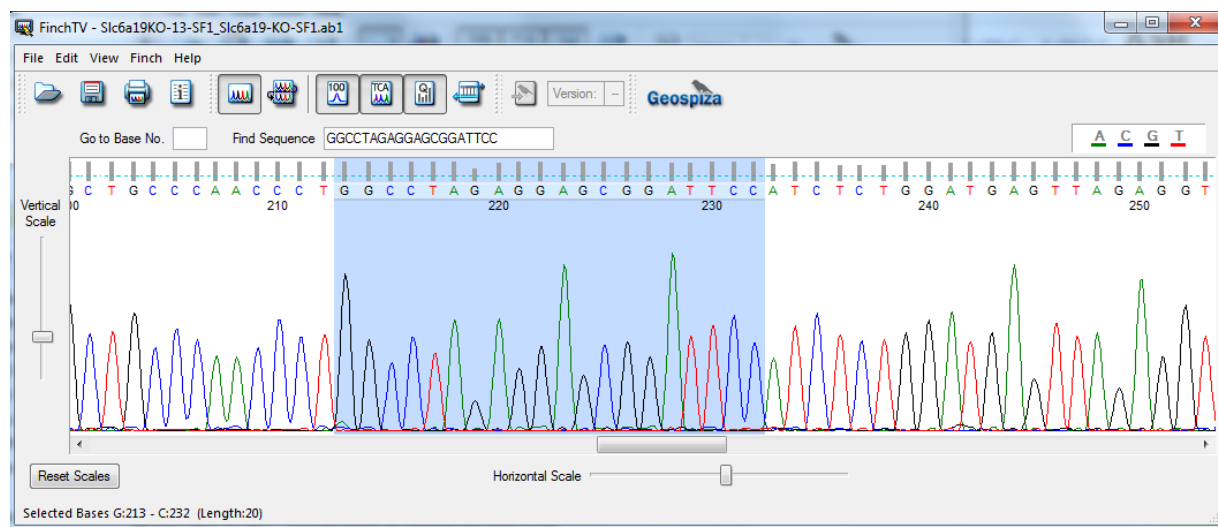

Reference AGGCTTGTGCTGCCCAAC**CCTGGCCTAGAGGAGCGGATTCC**ATCTCTGGATGAGTTAGAGGTC

Allele1 AGGCTTGTGCTGCCCAAC**CCTGGCCTAGAGGAGCGGATTCC**ATCTCTGGATGAGTTAGAGGTC

Allele2 AGGCTTGTGCTGCCCAAC**CCTGGCCTAGAGGAGCGGATTCC**ATCTCTGGATGAGTTAGAGGTC

##### Guide 2

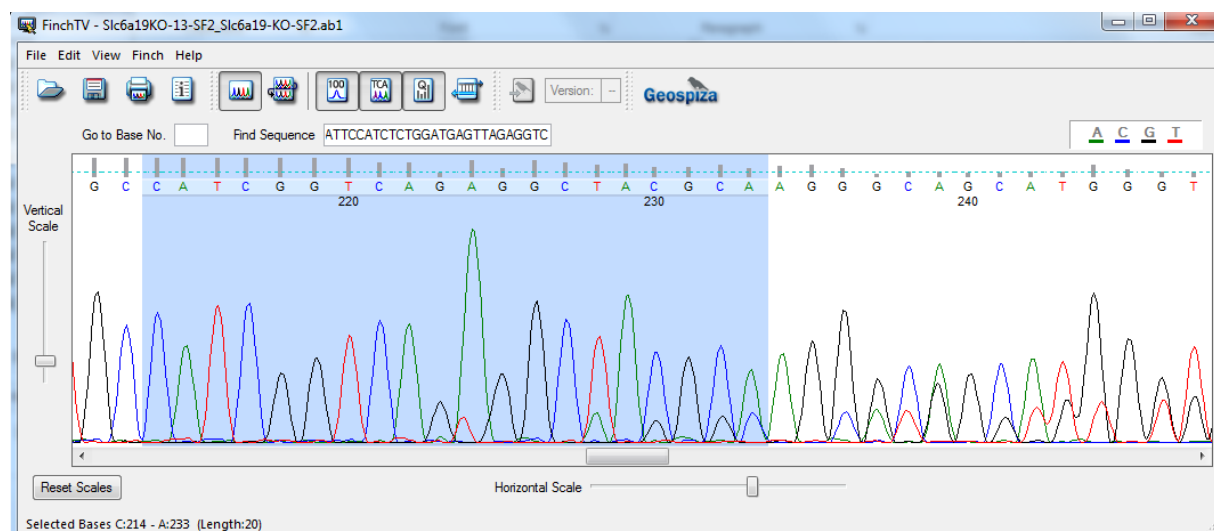

**Reference** TGCTGTACCTGGAGTTTGC **CATCGGTCAGAGGCTACGCA** **AGG**GCAGCATGGGTGTGTGGAG

**Allele1** TGCTGTACCTGGAGTTTGC **CATCGGTCAG-----TGGCA** **AGG**GCAGCATGGGTGTGTGGAG

**Allele2** TGCTGTACCTGGAGTTTGC **CATCGGTCAGAGGCTACGCA** **AGG**GCAGCATGGGTGTGTGGAG

Mouse sample ASD707:Maggot::F0#13 is WT in both alleles in guide 1 sequence region. In guide 2 sequence region, there are two alleles. The first allele carries 7bp deletion and 2bp insertion and the second allele is WT.
